# Supplementary material for: Sacrificial ZnO nanorods drive N and O dual-doped carbon towards trifunctional electrocatalysts for Zn–air batteries and self-powered water splitting devices
Source: Royal Society of Chemistry journal article supplement (doi:10.1039/d1cy00119a), 2021-01-01
Supplement: d1cy00119a1.pdf [file d1cy00119a1.pdf]

## Supporting Information

# Sacrificial ZnO nanorods drive N- and O- dual-doped carbon towards trifunctional electrocatalysts for Zn-air batteries and self-powered water splitting devices

Mohamed Elhousseini Hilal,<sup>a,b,c</sup> Hussein A. Younus,<sup>d,e</sup> Somboon Chaemchuen,<sup>a</sup> Sander Dekyvere,<sup>a,b</sup> Xianci Zeng,<sup>f</sup> Daping He,<sup>f</sup> Jihae Park,<sup>g</sup> Taejun Han,<sup>g</sup> and Francis Verpoort<sup>a,b,g,h\*</sup>

*a. State Key Laboratory of Advanced Technology for Materials Synthesis and Processing, Wuhan University of Technology, Wuhan 430070, China*

*b. School of Materials Science and Engineering, Wuhan University of Technology, Wuhan 430070, China*

*c. Chemistry and environment department, Faculty of Science and technology, Sultan Moulay Sliman University, Beni Mellal 23000, Morocco*

*d. Department of Chemistry, Faculty of Science, Fayoum University, Fayoum 63514, Egypt*

*e. College of Materials Science and Engineering, Hunan University, Changsha 410082, China.*

*f. Hubei Engineering Research Center of RF-Microwave Technology and Application, Wuhan University of Technology, Wuhan 430070, China*

*g. Ghent University, Global Campus Songdo, 119 Songdomunhwa-Ro, Yeonsu-Gu, Incheon 406-840, South Korea.*

*h. National Research Tomsk Polytechnic University, Tomsk 634050, Russian Federation*

E-mail: F. Verpoort; francis.verpoort@ghent.ac.kr,

**This Supplementary Information file includes:**

Supplementary Figures S1 to S18

Supplementary Table S1 to S5

References

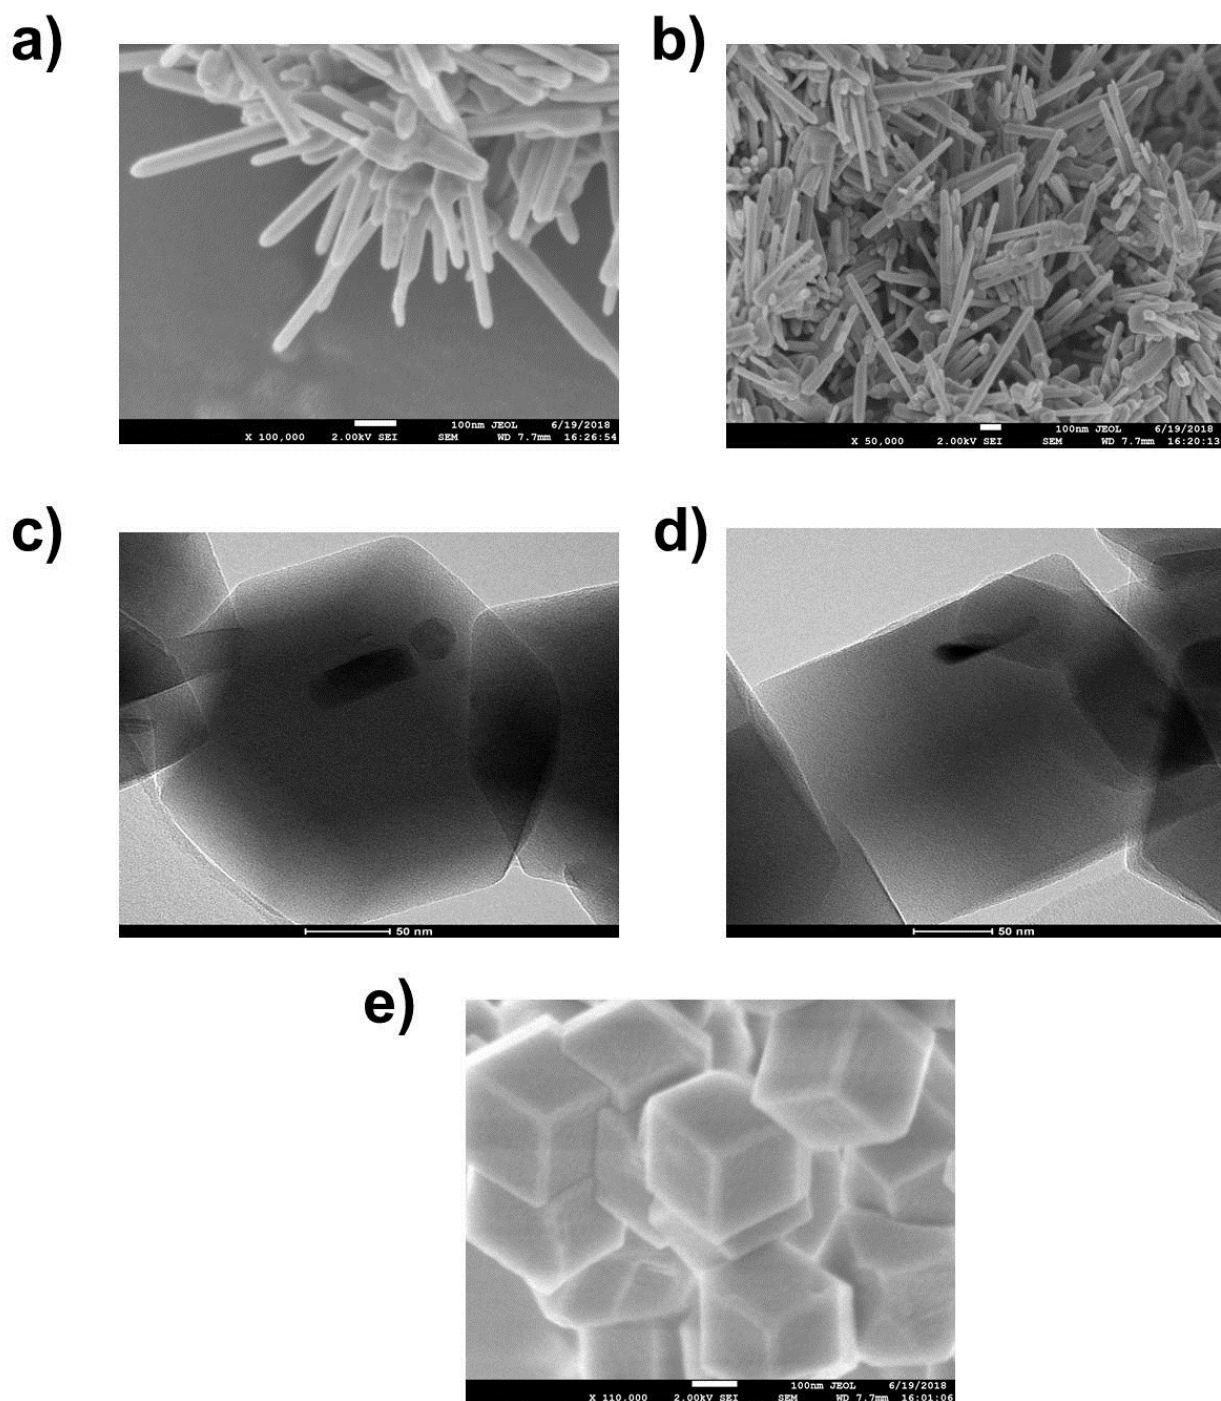

**Figure S1.** SEM micrographs of ZnO NRs (a, b); TEM micrographs of ZnONR@ZIF-67 (c, d); and SEM micrographs of ZIF-67 (e).

It is clear from **Figure S1a** and **b** that the ZnO nanorods share one base as their growth by thermal decomposition mechanism dictates.<sup>1</sup> Thus, the dispersion of ZnO nanorods in methanol is applied for the purpose of breaking this compact bulky structure to smaller single ZnO nanorods, before the growth of ZIF-67.

This dispersion breaks the nanorods to smaller sizes as visible from inside ZIF-67 polyhedra in **Figure S1c** and **d**.

It is to note that the nanorods inside ZIF-67 polyhedra cannot have the same size since the breaking happens in a random trend during methanol dispersion. For instance, ZnO nanorods sizes measured in **Figure S1c** and **d**, are only 69 nm and 71 nm, respectively.

| Average ZnO NR Width (nm)           | Average ZnO NR length (nm)               |
|-------------------------------------|------------------------------------------|
| 33 (4)                              | 346 (28)                                 |
| <u>ZIF-67 Average diameter (nm)</u> | <u>ZnONR@ZIF67 Average diameter (nm)</u> |
| <u>177 (17)</u>                     | <u>210 (8)</u>                           |

**Table S1. The average diameters and lengths of ZnO NR, ZIF-67 and ZnONR@ZIF-67.**

All the measurements were taken from SEM micrographs and elaborated via ImageJ, the average is displayed on the tables above. ZIF-67 was synthesized with 8:1 mIm/Co nitrates,<sup>1</sup> except that it involves no ZnO NR, XRD and SEM characterizations were applied on it for the purpose of comparison.

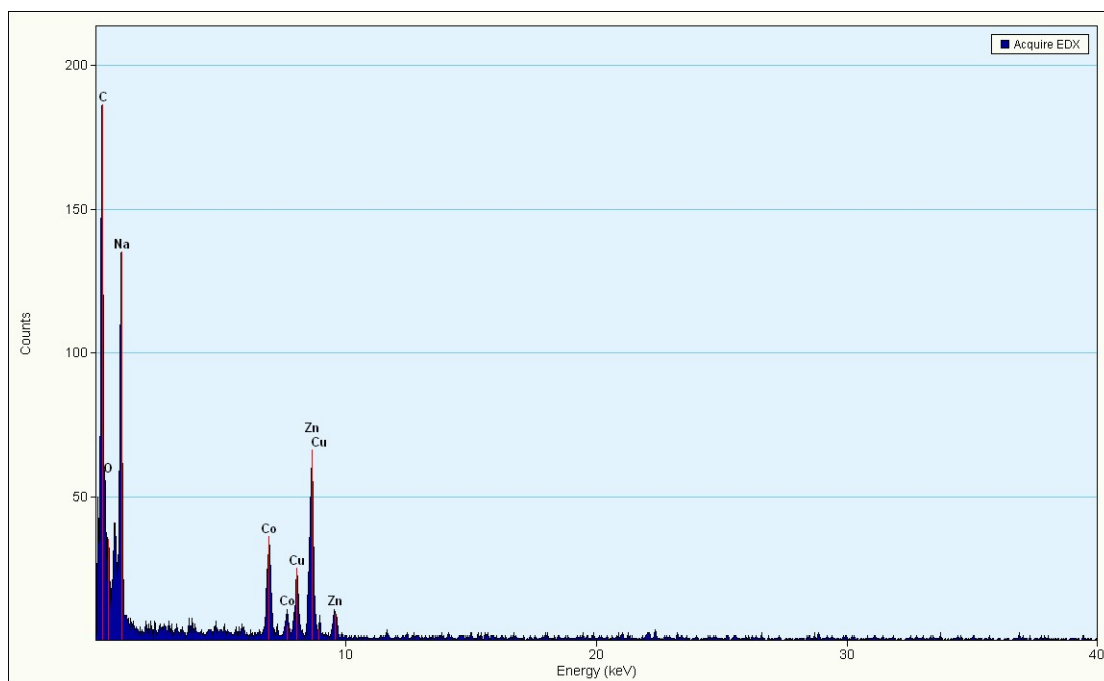

**Figure S2.** Localized TEM-EDX spectrum of ZnONR@ZIF-67. The spectrum asserts the presence of zinc, oxygen, cobalt, and carbon, while the presence of Na and Cu is due to the instrument.

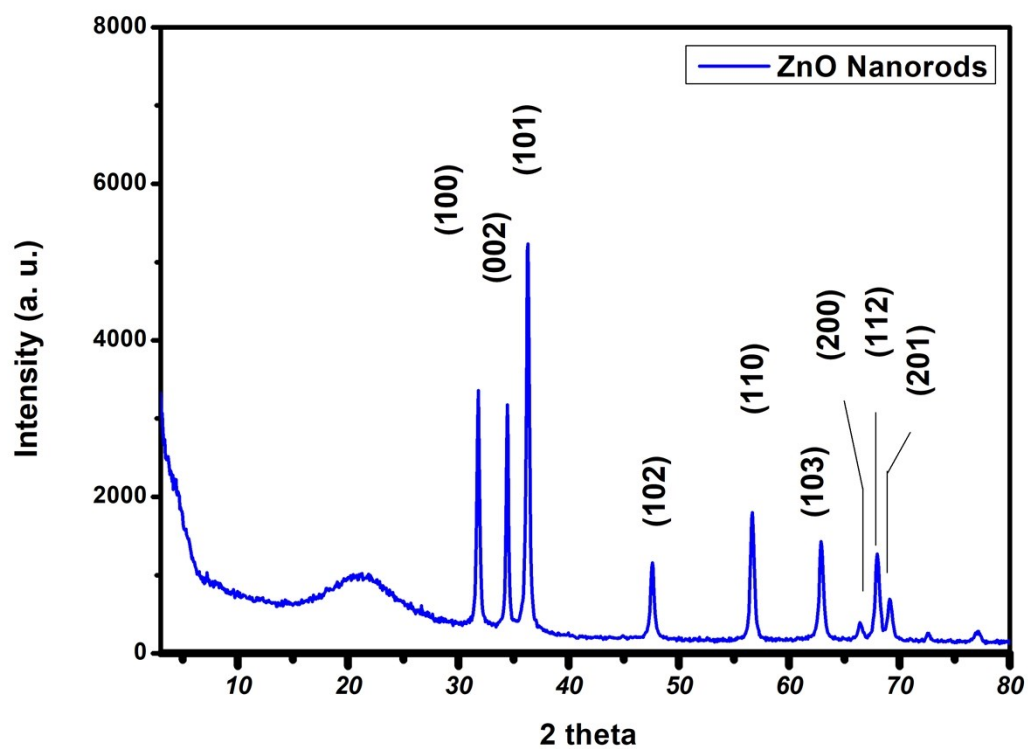

**Figure S3.** XRD pattern of synthesized ZnO nanorods. This pattern matches ZnO wurtzite phase JCPDS 01-070-8070.

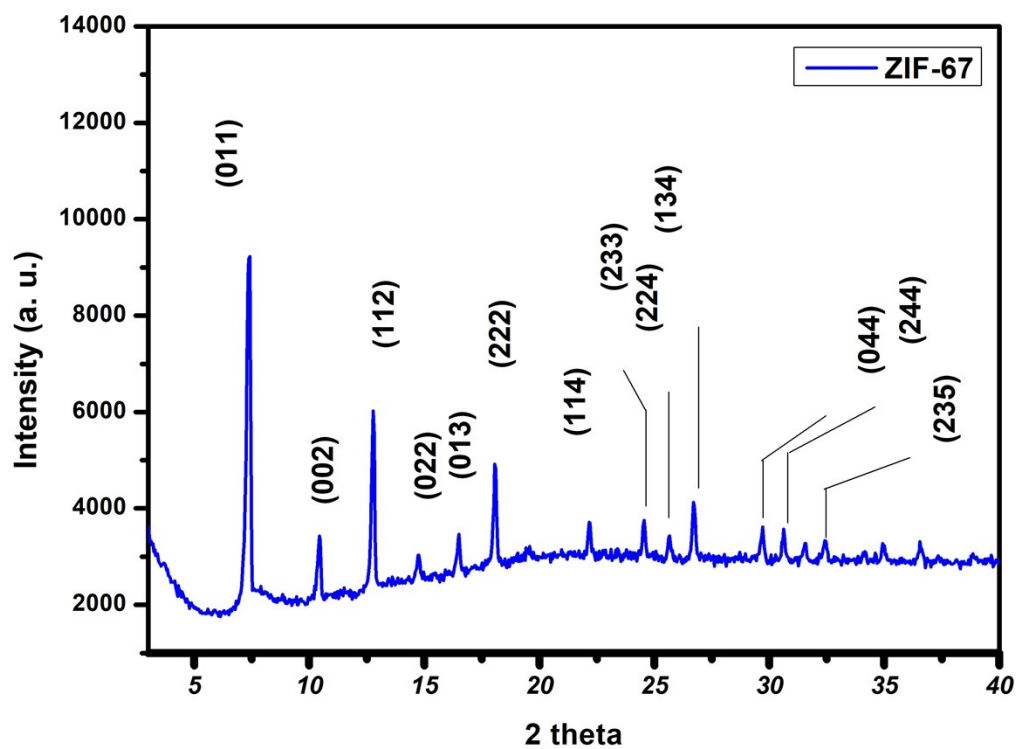

**Figure S4. XRD spectrum of ZIF-67.**

The XRD pattern shows the diffractions of ZIF-67 synthesized with Cobalt metal salt, and 2-mlm with a ratio of 1 to 8, respectively.

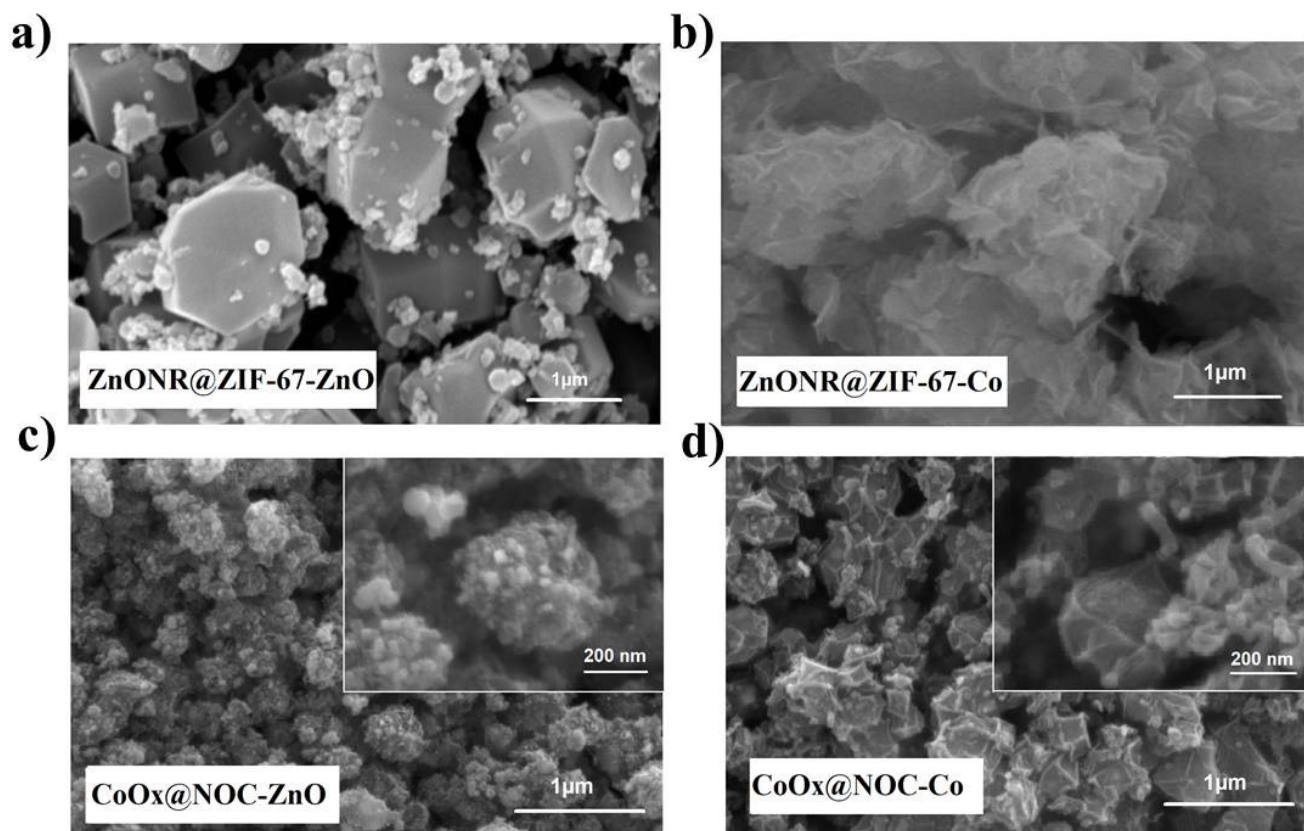

**Figure S5: SEM micrographs of ZnONR@ZIF-67-ZnO (a) and ZnONR@ZIF-67-Co (b) and their adjacent pyrolyzed samples CoOx@NOC-ZnO (c) and CoOx@NOC-Co (d).**



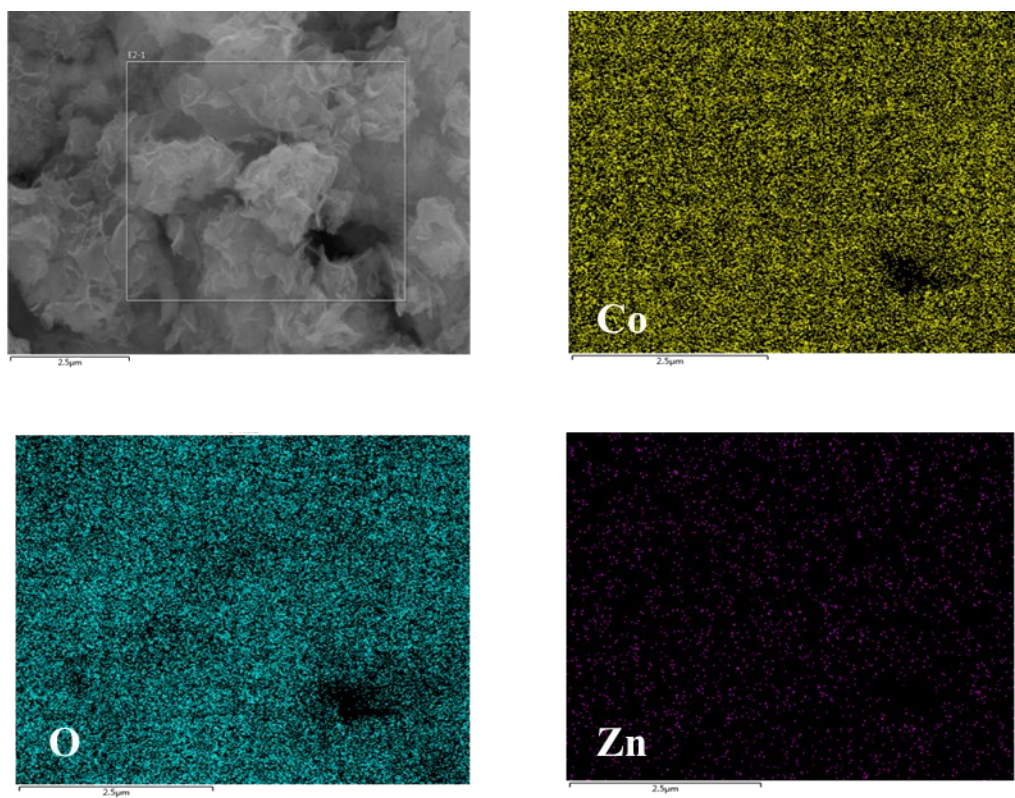

**Figure S6: SEM-EDS mapping of ZnONR@ZIF-67-Co.**

| Elements of the samples |        | CoOx@NOC-ZnO | CoOx@NOC | CoOx@NOC-Co | CoOx@NC |
|-------------------------|--------|--------------|----------|-------------|---------|
| ICP                     | Zn (%) | 0.12         | 0.051    | 0.032       | -       |
|                         | Co (%) | 20.45        | 24.97    | 31.64       | -       |
| Element Analysis        | N (%)  | 2.63         | 2.32     | 2.08        | 1.2     |
|                         | C (%)  | 47           | 57.69    | 51          | 41      |

**Table S2.** The ICP and elemental analysis for the 4 pyrolysed samples, CoOx@NOC-ZnO, CoOx@NOC, CoOx@NOC-Co and Co@NC.

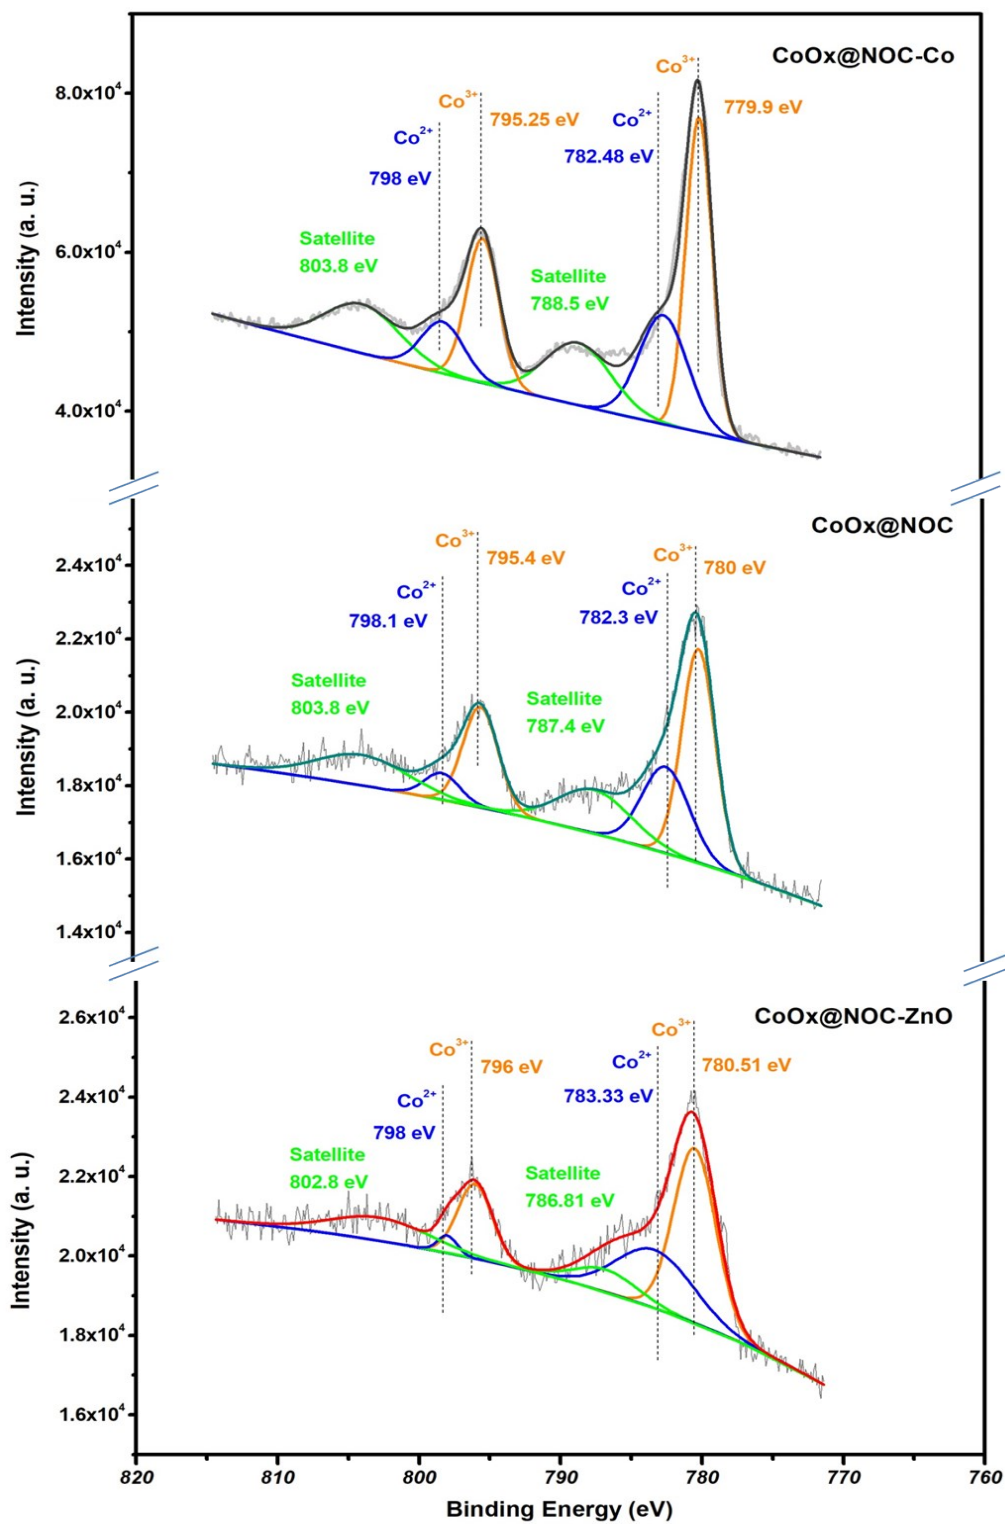

Figure S7: The deconvolution of Co2p XPS high resolution spectra

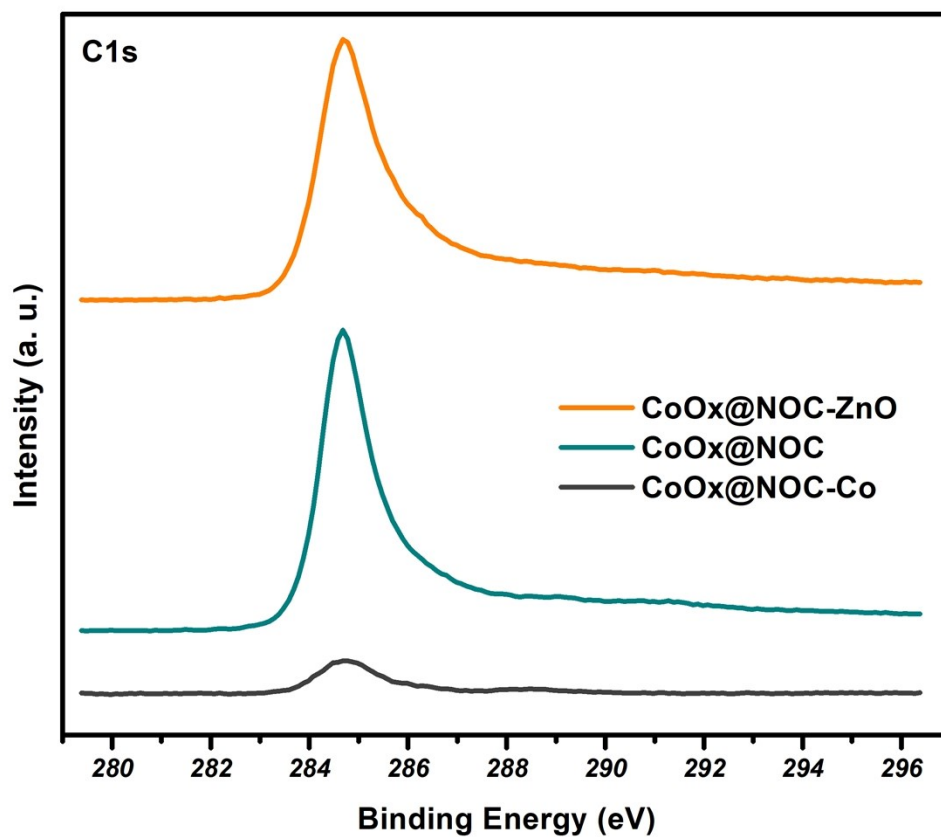

*Figure S8: C1s XPS high resolution spectra*

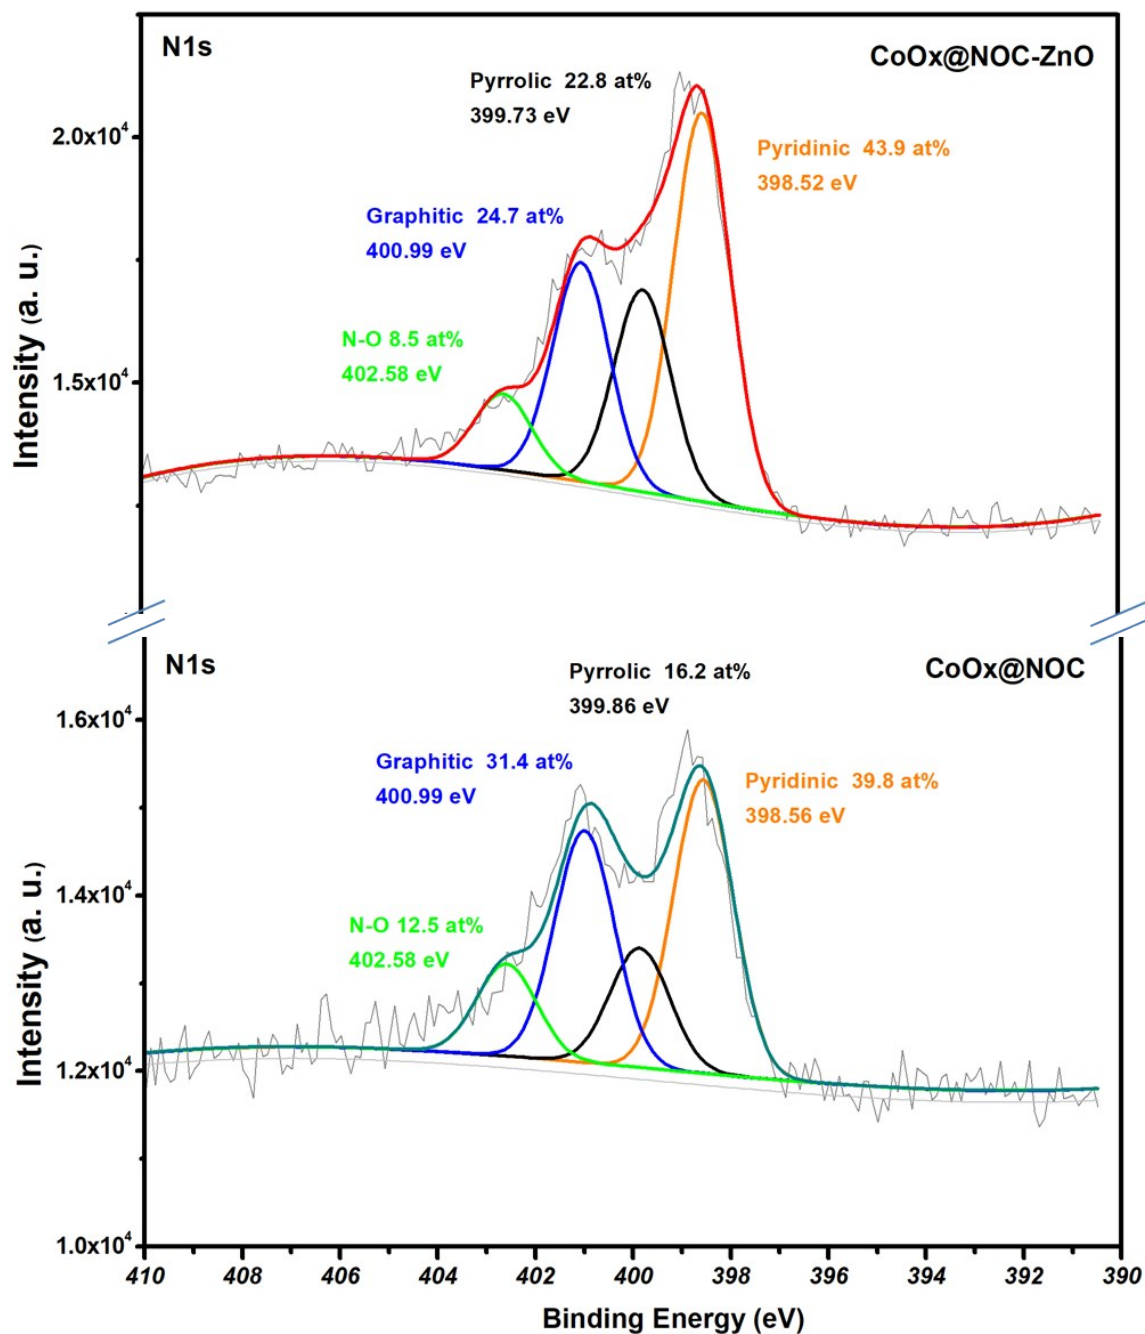

**Figure S9:** The deconvolution of N1s XPS high resolution spectrums of CoOx@NOC-ZnO and CoOx@NOC

a)

| Sample           | BET surface area            |
|------------------|-----------------------------|
| ZnONR@ZIF-67-Co  | 81.5161 m <sup>2</sup> /g   |
| CoOx@NOC-Co      | 102.7661 m <sup>2</sup> /g  |
| ZnONR@ZIF-67     | 1906.0076 m <sup>2</sup> /g |
| CoOx@NOC         | 291.9708 m <sup>2</sup> /g  |
| ZnONR@ZIF-67-ZnO | 912.6553 m <sup>2</sup> /g  |
| CoOx@NOC-ZnO     | 456.9852 m <sup>2</sup> /g  |

b)

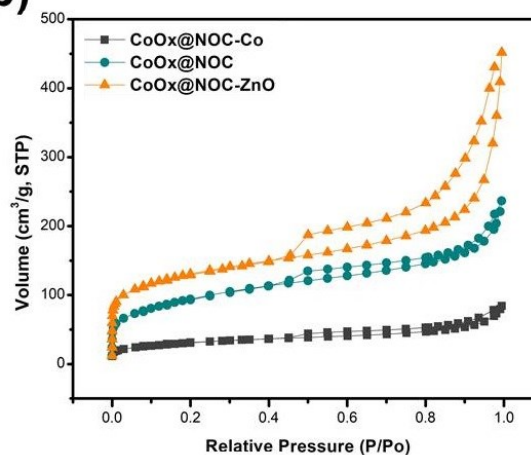

c)

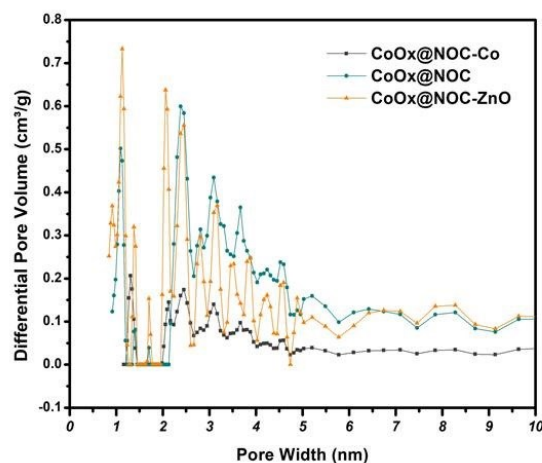

**Figure S10: Nitrogen adsorption and desorption analysis of the three samples. a) Table of BET surface areas of the three main ratios before and after pyrolysis; b) The N<sub>2</sub> adsorption isotherms of the three samples. c) The corresponding Pore-size distribution as derived from N<sub>2</sub> sorption.**

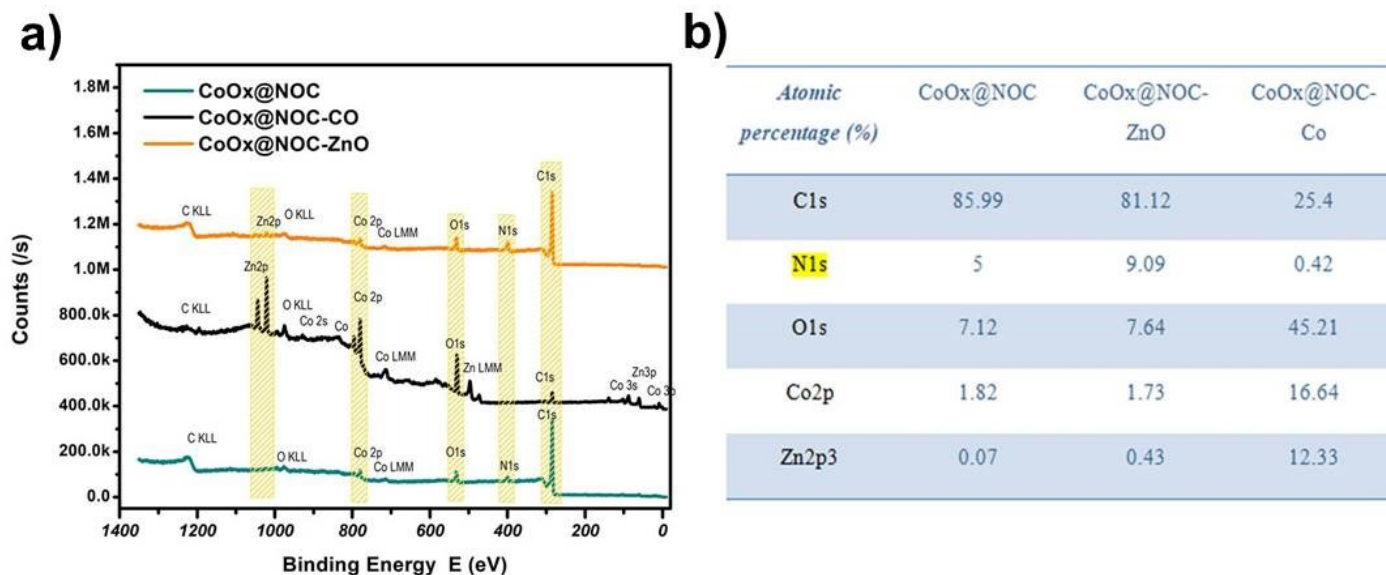

**Figure S11: a) XPS survey of the three samples; b) The elemental content percentages from XPS survey.**

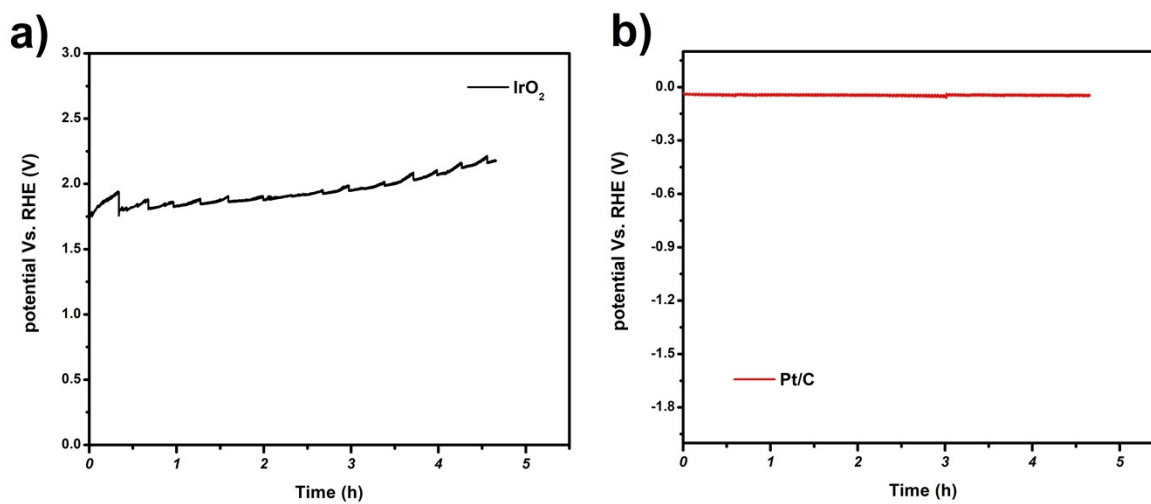

**Figure S12: I-t stability test of IrO<sub>2</sub> for OER at a current density of 15 mA cm<sup>-2</sup>, and Pt/C for HER at 20 mA cm<sup>-2</sup>.**

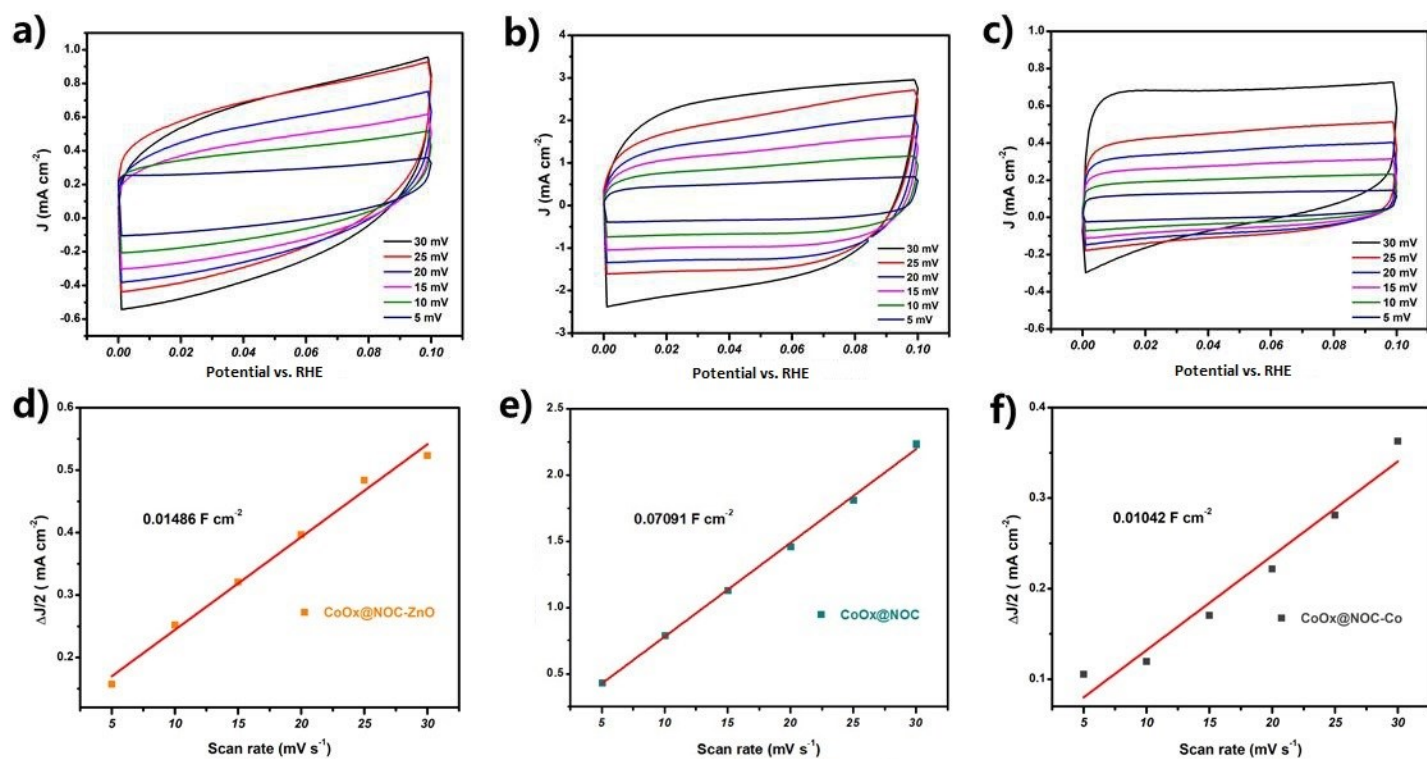

**Figure S13: CVs and correspondent Cdl curve of CoOx@NOC, CoOx@NOC-ZnO and CoOx@NOC-Co**



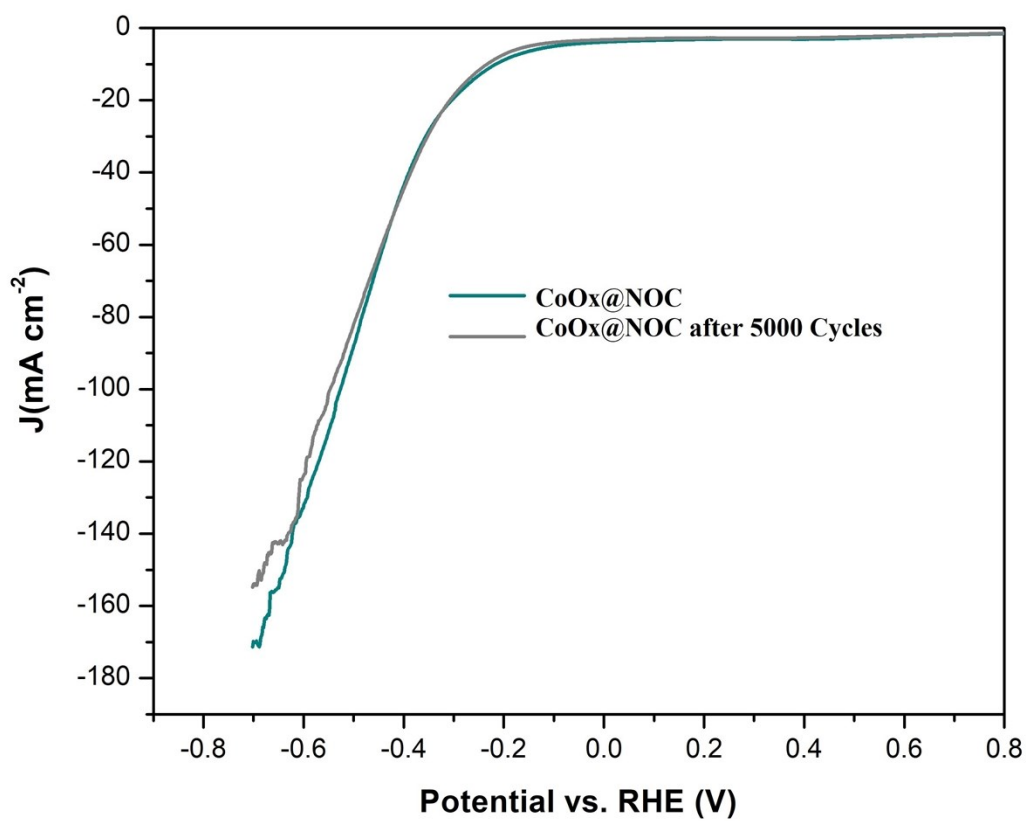

**Figure S14: HER LSV of CoOx@NOC after and before 5000 Cycles**

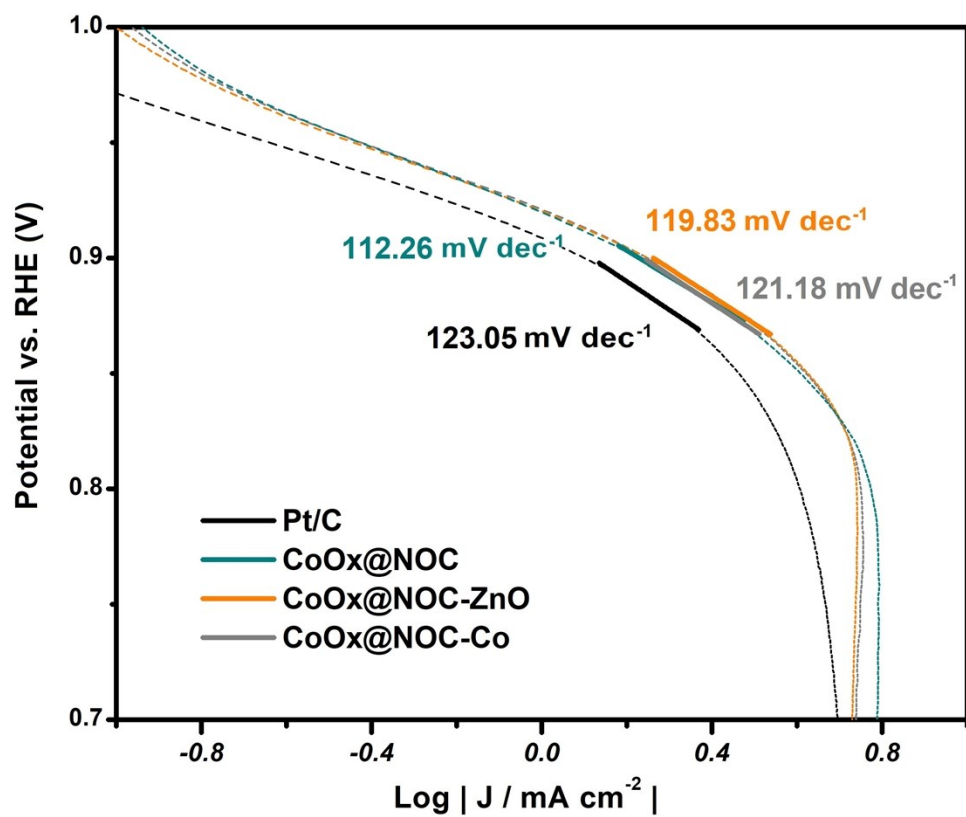

Figure S15: ORR Tafel slopes of CoOx@NOC-Co

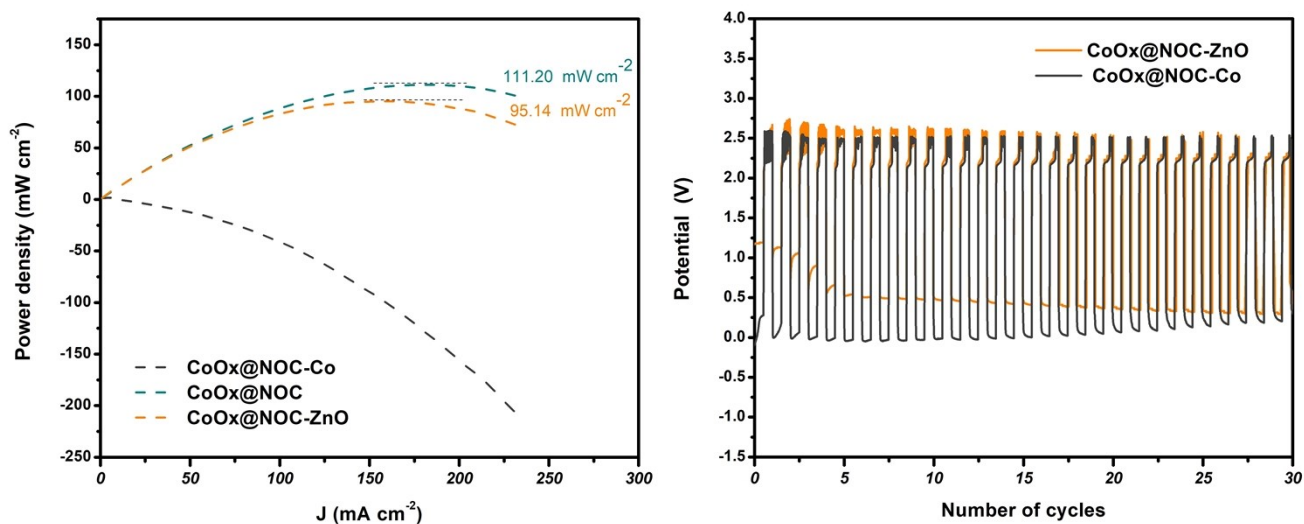

**Figure S16: Power densities of CoOx@NOC-ZnO and CoOx@NOC-Co along with CoOx@NOC based ZABs (a); Galvanostatic charge–discharge curves of CoOx@NOC-Co and CoOx@NOC-ZnO based ZABs.**

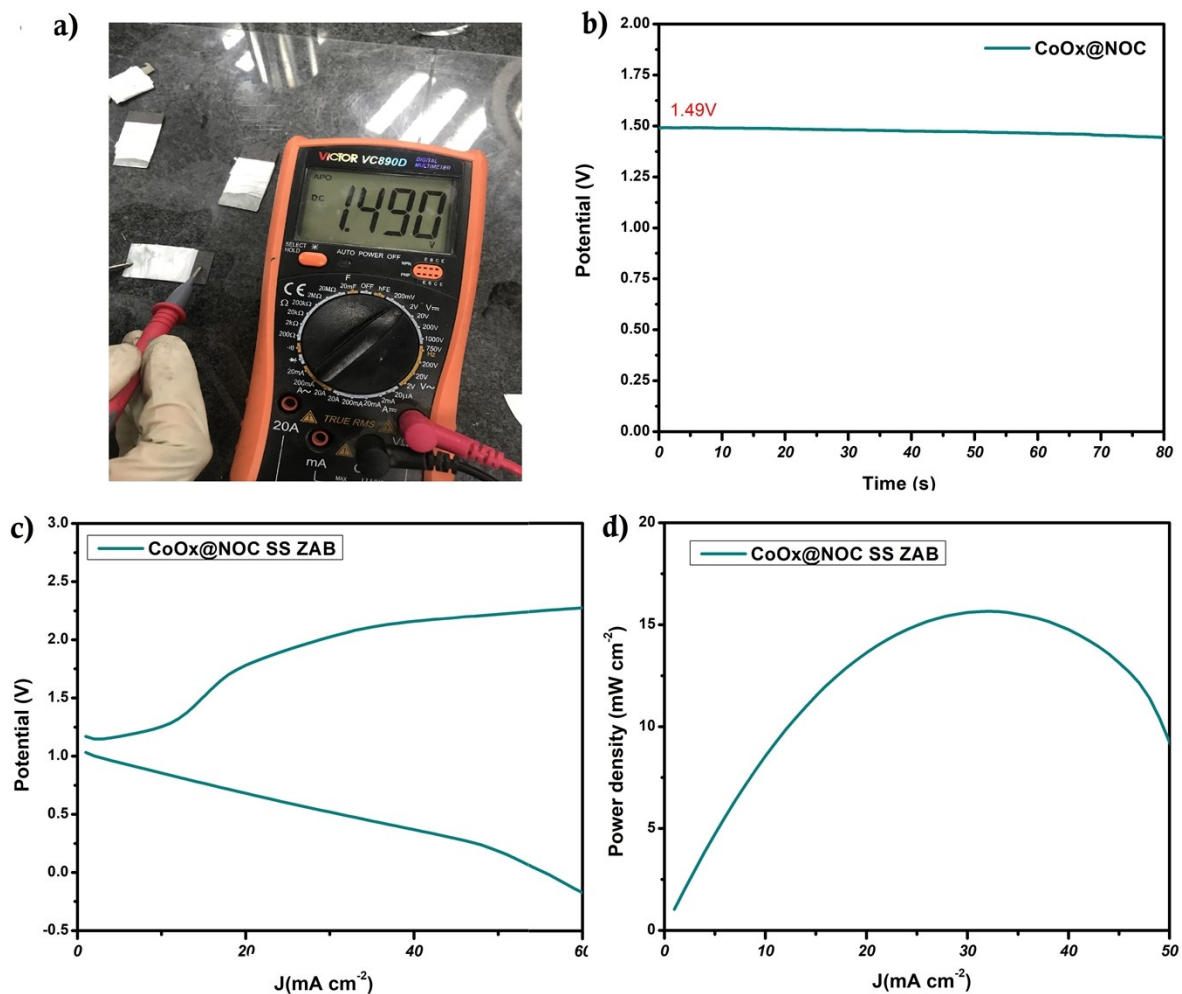

**Figure S17: Performance assessment of CoOx@NOC based SS ZAB, with 1 mg cm<sup>-2</sup> of mass loading on a surface of 4 cm<sup>2</sup>. (a) Photograph of the SS ZAB and multimeter showing the open circuit potential; (b) Open circuit potential of CoOx@NOC based SS ZAB; (c) Charge–discharge polarization curves; (d) Power density curve.**

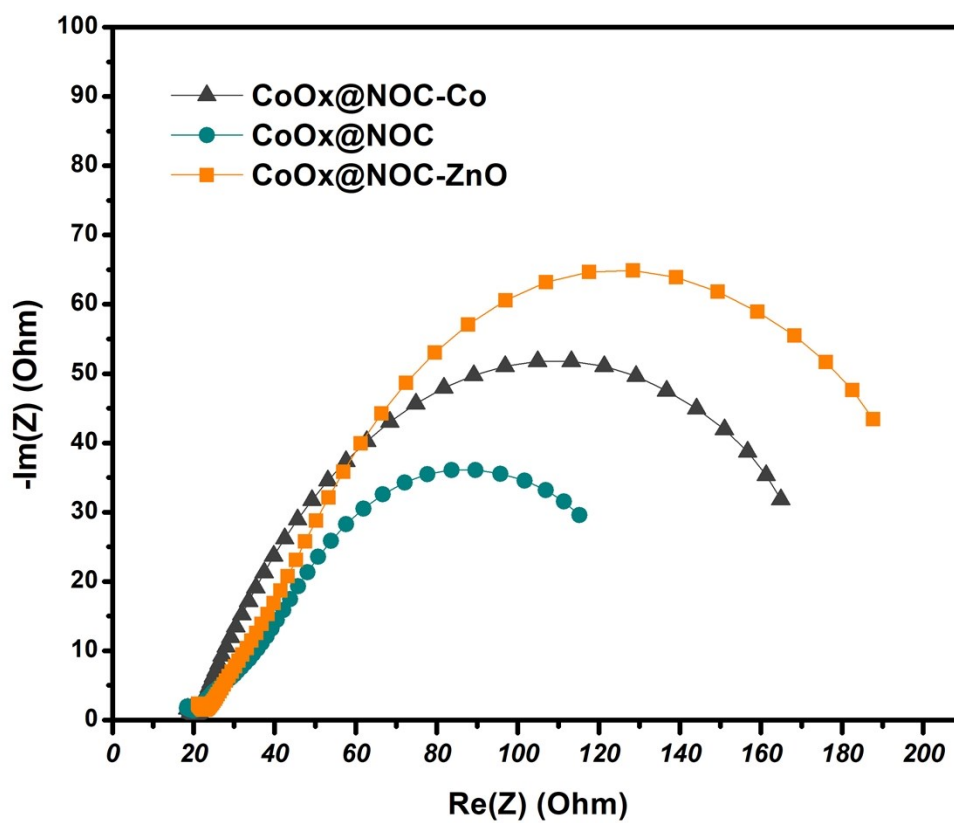

**Figure S18:** Nyquist plots of CoOx@NOC-ZnO, CoOx@NOC, and CoOx@NOC-Co at 0.6 V in a frequency range of 100 kHz to 1 Hz, with an amplitude of 5 mV.

**Table S3. Comparison of the electrocatalytic activity of Co-Carbon based bifunctional**

| Materials                                     | OER            |                 | ORR           |                                                | $\Delta E$ | Loading                  | References   |
|-----------------------------------------------|----------------|-----------------|---------------|------------------------------------------------|------------|--------------------------|--------------|
|                                               | $E_{j=10}$ (V) | $E_{onset}$ (V) | $E_{1/2}$ (V) | Maximum current density (mA cm <sup>-2</sup> ) |            |                          |              |
| CoO <sub>x</sub> @NOC                         | 1.48           | 0.96            | 0.86          | -6.15                                          | 0.62       | 0.75 mg cm <sup>-2</sup> | Current work |
| CoO <sub>x</sub> @NOC-ZnO                     | 1.55           | 0.95            | 0.87          | -5.57                                          | 0.69       | 0.75 mg cm <sup>-2</sup> | Current work |
| CoO <sub>x</sub> @NOC-Co                      | 1.56           | 0.96            | 0.87          | -5.59                                          | 0.7        | 0.75 mg cm <sup>-2</sup> | Current work |
| Pt/C                                          | -              | 0.96            | 0.86          | -5.15                                          | -          | 0.75 mg cm <sup>-2</sup> | Current work |
| IrO <sub>2</sub>                              | 1.75           | -               | -             | -                                              | -          | 0.75 mg cm <sup>-2</sup> | Current work |
| CoNC-CNF-1000                                 | 1.68           | -               | 0.8           | -                                              | -          |                          | 2            |
| Co(OH)F/CuCo <sub>2</sub> S <sub>4</sub>      | 1.40           |                 | 0.8           |                                                |            |                          | 3            |
| ZCP-CFs-900                                   | -              | -               | 0.805         | -5.6                                           | -          |                          | 4            |
| P-doped ZIF8-derived carbons                  | -              | -               | 0.77          | -5.7                                           | -          |                          | 5            |
| Fe <sub>0.3</sub> Co <sub>0.7</sub> /NC cages | -              | -               | 0.88          | -6                                             | -          |                          | 6            |
| NC@GC                                         | 1.57           | -               | -             | -                                              | -          |                          | 7            |
| Co-N-CNT                                      | 1.69           | 0.97            | 0.9           | ~ -5.77                                        | 0.79       |                          | 8            |
| N-GCNT/FeCo                                   | 1.59           | 0.97            | 0.87          |                                                | 0.72       |                          | 9            |
| Co <sub>3</sub> O <sub>4</sub> /NPGC          | 1.68           | 0.97            | 0.84          | ~ -5.9                                         | 0.84       |                          | 10           |
| NCNTFs                                        | 1.6            | 0.97            | 0.87          | ~ -5.2                                         | 0.73       |                          | 11           |
| P,S-CNS                                       | 1.59           | 0.97            | 0.87          | -                                              | 0.72       |                          | 12           |

|                           |      |      |      |        |      |    |
|---------------------------|------|------|------|--------|------|----|
| <b>N-GRW</b>              | 1.59 | 0.92 | 0.84 | -      | 0.75 | 13 |
| <b>N, S-CN</b>            | 1.64 | 0.91 | 0.76 | -      | 0.88 | 14 |
| <b>Cu@NCN<br/>T/CoxOy</b> | 1.6  | 0.95 | 0.82 | ~ -5.6 | 0.78 | 15 |
| <b>NPMCs</b>              | 1.58 | 0.94 | 0.85 |        | 0.73 | 16 |

All values in the table above are vs. RHE.

**Table S4. Comparison of the BET surface area,  $C_{dl}$ , and active sites of trifunctional electrocatalysts:**

| <b>Materials</b>                                              | <b>Surface Area (<math>m^2 g^{-1}</math>)</b> | <b><math>C_{dl}</math> (<math>mF cm^{-2}</math>)</b> | <b>Ref</b>       |
|---------------------------------------------------------------|-----------------------------------------------|------------------------------------------------------|------------------|
| <b>CoOx@NOC</b>                                               | 292                                           | 70.9                                                 | <i>This Work</i> |
| <b>CoOx@NOC-ZnO</b>                                           | 457                                           | 14.8                                                 | <i>This Work</i> |
| <b>CoOx@NOC-Co</b>                                            | 103                                           | 10.25                                                | <i>This Work</i> |
| <b>Cu-Foam@CuCoNC500</b>                                      | -                                             | 64.85                                                | 17               |
| <b>CoSA + Co<sub>9</sub>S<sub>8</sub>/HCNT</b>                | 636                                           | 51.33                                                | 18               |
| <b>GH-BGQD</b>                                                | 320                                           | -                                                    | 19               |
| <b>CoSx@Cu<sub>2</sub>MoS<sub>4</sub>-MoS<sub>2</sub>/NSG</b> | 204                                           | 17                                                   | 20               |
| <b>Co<sub>5.47</sub>N@N-rGO-750</b>                           | 144                                           | 13.5                                                 | 21               |
| <b>NiFe(II,III)-LDH</b>                                       | -                                             | 1.45                                                 | 22               |
| <b>Fe<sub>0.5</sub>Ni<sub>0.5</sub>@N-GR</b>                  | 106                                           | 12                                                   | 23               |



**Table S5. Comparison of the trifunctional electrocatalysts employed in Zn-air battery powered overall water splitting:**

| <i>Materials</i>                                             | <i>Zn-air battery</i>             |                                                                                     |                                                | <i>Overall Water Splitting</i> | <i>Date</i> | <i>Ref</i>            |
|--------------------------------------------------------------|-----------------------------------|-------------------------------------------------------------------------------------|------------------------------------------------|--------------------------------|-------------|-----------------------|
|                                                              | <i>Liquid-electrolyte battery</i> |                                                                                     | <i>Solid-state battery</i>                     |                                |             |                       |
|                                                              | <i>Open potential (V)</i>         | <i>Specific capacity (mAh g<sup>-1</sup><sub>Zn</sub>) at 10 mA cm<sup>-2</sup></i> | <i>Max. Power density (mW cm<sup>-2</sup>)</i> | <i>Open potential (V)</i>      |             |                       |
| CoOx@NOC                                                     | 1.57                              | 757                                                                                 | 141.65                                         | 1.49                           | 1.51        | -<br><i>This Work</i> |
| Cu-Foam@CuCoNC500                                            | 1.4                               | 798                                                                                 | 140                                            | 1.31                           | 1.52        | 2019<br>17            |
| CoSA + Co <sub>9</sub> S <sub>8</sub> /HCNT                  | 1.45                              | 788 (at 100 mA cm <sup>-2</sup> )                                                   | 177.33                                         | 1.41                           | 1.59        | 2020<br>18            |
| FeCo/Co <sub>2</sub> P@NPCF                                  | 1.44                              | -                                                                                   | 154                                            | 1.257                          | 1.68        | 2020<br>24            |
| GH-BGQD                                                      | 1.40                              | 687                                                                                 | 112                                            | 1.40                           | 1.61        | 2019<br>19            |
| CoSx@Cu <sub>2</sub> MoS <sub>4</sub> -MoS <sub>2</sub> /NSG | 1.44                              | -                                                                                   | (Solid-State) 40                               | 1.442                          | 1.60        | 2020<br>20            |
| Co <sub>5.47</sub> N@N-rGO-750                               | 1.45                              | 788.5                                                                               | 121                                            | 1.4                            | -           | 2019<br>21            |
| NOGB-800                                                     | 1.5                               | -                                                                                   | 111.9                                          | -                              | 1.65        | 2019<br>22            |
| NiCoOS                                                       | -                                 | -                                                                                   | 90                                             | -                              | 1.52        | 2019<br>25            |
| NiFe(II,III)-LDH                                             | 1.26                              | -                                                                                   | -                                              | -                              | 1.54        | 2019<br>26            |
| Fe <sub>0.5</sub> Ni <sub>0.5</sub> @N-GR                    | 1.482                             | 765                                                                                 | 85                                             | 1.352                          | 1.69        | 2018<br>23            |

*Supporting references*

- 1 K. Zhou, B. Mousavia, Z. Luo, S. Phatanasri, S. Chaemchuen, *Journal of Materials Chemistry A*, 2017, **5**, 952.
- 2 W. Zhang, X. Yao, S. Zhou, X. Li, L. Li, Z. Yu and L. Gu, *Small*, 2018, **14**, 1800423.
- 3 X. Ding, Y. Xia, Q. Li, S. Dong, X. Jiao and D. Chen, *ACS Applied Materials & Interfaces*, 2019, **11**, 7936–7945.
- 4 C. Liu, J. Wang, J. Li, J. Liu, C. Wang, X. Sun, J. Shen, W. Han and L. Wang, *Journal of Materials Chemistry A*, 2017, **5**, 1211–1220.
- 5 W. Zhang, Z. Y. Wu, H. L. Jiang and S. H. Yu, *Journal of the American Chemical Society*, 2014, **136**, 14385–14388.
- 6 B. Y. Guan, Y. Lu, Y. Wang, M. Wu and X. W. D. Lou, *Advanced Functional Materials*, 2018, **28**, 1–10.
- 7 X. Wang, T. Gao, F. Han, Z. Ma, Z. Zhang, J. Li and C. Wang, *Nano Energy*, 2016, **16**, 30465.
- 8 T. Wang, Z. Kou, S. Mu, J. Liu, D. He, I. S. Amiin, W. Meng, K. Zhou, Z. Luo, S. Chaemchuen and F. Verpoort, *Advanced Functional Materials*, 2018, **28**, 1705048.
- 9 K. Sakaushi, A. Lyalin, S. Tominaka, T. Taketsugu and K. Uosaki, *ACS Nano*, 2017, **11**, 1770–1779.
- 10 G. Li, X. Wang, J. Fu, J. Li, M. G. Park, Y. Zhang, G. Lui and Z. Chen, *Angewandte Chemie - International Edition*, 2016, **55**, 4977–4982.
- 11 B. Y. Xia, Y. Yan, N. Li, H. Bin Wu, X. W. D. Lou and X. Wang, *Nature Energy*, 2016, **1**, 1–8.
- 12 S. S. Shinde, C. H. Lee, A. Sami, D. H. Kim, S. U. Lee and J. H. Lee, *ACS Nano*, 2017, **11**, 347–357.
- 13 H. B. Yang, J. Miao, S.-F. Hung, J. Chen, H. B. Tao, X. Wang, L. Zhang, R. Chen, J. Gao, H. M. Chen, L. Dai and B. Liu, *Science Advances*, 2016, **2**, e1501122–e1501122.
- 14 Q. Tang, Y. Cui, J. Wu, D. Qu, A. P. Baker, Y. Ma, X. Song and Y. Liu, *Nano Energy*, 2017, **41**, 377–386.
- 15 X. Zhao, F. Li, R. Wang, J. M. Seo, H. J. Choi, S. M. Jung, J. Mahmood, I. Y. Jeon and J. B. Baek, *Advanced Functional Materials*, 2017, **27**, 1605717.
- 16 J. Zhang, Z. Zhao, Z. Xia and L. Dai, *Nature Nanotechnology*, 2015, **10**, 444–452.
- 17 H. Sun, Q. Li, Y. Lian, C. Zhang, P. Qi and Q. Mu, *Applied Catalysis B: Environmental*, 2019, **263**, 118139.
- 18 Y. Li, R. Cao, L. Li, X. Tang, T. Chu, B. Huang, K. Yuan and Y. Chen, *Small*, 2020, **16**, 1906735.
- 19 T. Van Tam, S. G. Kang, M. H. Kim, S. G. Lee and S. H. Hur, *Advanced Energy Materials*, 2019, **9**, 1900945.
- 20 D. C. Nguyen, D. T. Tran, T. Luu, L. Doan, D. H. Kim, N. H. Kim and J. H. Lee, *Advanced Energy Materials*, 2020, **10**, 1903289.
- 21 X. Shu, S. Chen, S. Chen, W. Pan and J. Zhang, *Carbon*, 2019, **157**, 234.
- 22 Q. Hu, G. Li, G. Li, X. Liu, B. Zhu, X. Chai and Q. Zhang, *Advanced Energy Materials*, 2019, **9**, 1803867.
- 23 P. Liu, D. Gao, W. Xiao, L. Ma, K. Sun, P. Xi, D. Xue and J. Wang, *Advanced Functional*

- Materials*, 2018, **28**, 1706928.
- 24 Q. Shi, Q. Liu, Y. Ma, Z. Fang, Z. Liang, G. Shao, B. Tang and W. Yang, *Advanced Energy Materials*, 2020, **10**, 1903854.
- 25 Z. Bai, S. Li, J. Fu, Q. Zhang, F. Chang, L. Yang, J. Lu and Z. Chen, *Nano Energy*, 2019, **58**, 680–686.
- 26 X. Meng, J. Han, L. Lu, G. Qiu, Z. L. Wang and C. Sun, *Small*, 2019, **15**, 1902551.
